# Supplementary material
Source: publisher figshare collection journal article supplement (https://geolsoc.figshare.com/ndownloader/files/31096422)
Supplement: Supplementary file 1 [file 31096422]

## Sheet: Paly_table
PALYNOLOGICAL DATA
Supplemental Table. Palynological assemblages and ages for silstone samples from the Chuquichambi-Belen succession.
Sample	Spores and Pollen																																				Microfauna
	Bombax sp.	Cedridites sp.	Deltoidospora spp.	Echiperiporites akanthos	Lycopodiumsporites sp.	Monoporites annulatus	Psilatricolporites maculosus	Retitricolporites amazonensis	Podocarpidites sp. 1	Podocarpidites sp. 2	Psilaperiporites minimus	Taxodiaceae	Scabraperiporites nativensis	Psilaperiporites robustus	Zonocostites ramonae	Acacia sp.	Retitricolpites sp.	Chomotriletes fragilis	Echiperiporites estelae	Echitriletes muelleri	Microthyriaceae	Monocolpites sp.	Osmundacidites sp.	Polypodiaceoisporites potonei	Ulmoideipites krempii	Araucariacites australis	Tricolporopollenites hians	Margocolporites vanwijhei	Monocolpate sp.	Psilatricolporites crassus	Retibrevitricolpites triangulatus (?)	Retitricolporites hispidus	Schizosporis reticulatus	Polypodiaceoisporites sp.	Sphagnum sp.		Pediastrum sp.	Pediastrum paleogeneites
Oligocene																																										Additional Notes: Not for publication
PA720.4465	R	R	F	R	R	R	R	R	R	R	R	R																														Horton et al., 2001 GSAB (Table 1): TABLE 1. PALYNOLOGICAL AGE DATA FOR POTOCO FORMATION
late Eocene to early Oligocene
PA79.0	R	R	R			R					R	R	R	R	R		R	R	R	R	R	R	R	R	R																	Horton et al., 2001 GSAB (Table 1): TABLE 1. PALYNOLOGICAL AGE DATA FOR POTOCO FORMATION
CQP-6																																R										UNPUBLISHED
late Eocene
CQP-8				R					F	R			F			R			R							R	R	R		R		R		R	R							UNPUBLISHED
CQP-4													R		R											R			R	R	R	R	R					R				UNPUBLISHED
Note: Occurrence frequency of specimens in individual samples:
R = Rare, less than 6 specimens/slide;
F = Frequent, 6 to 15 specimens/slide;
C = Common, 16 to 30 specimens/slide;
A = Abundant, over 30 specimens/slide.
PUBLISHED PALYNOLOGICAL DATA
below is Table 1 from Horton et al., 2001
Horton et al., 2001 GSAB (Table 1): TABLE 1. PALYNOLOGICAL AGE DATA FOR POTOCO FORMATION
TABLE 1. PALYNOLOGICAL AGE DATA FOR POTOCO FORMATION
Sample																Spores and Pollen																											Microfauna
	Bombax sp.	Cedridites sp.	Deltoidospora spp.	Echiperiporites akanthos	Lycopodiumsporites sp.	Monoporites annulatus	Psilatricolporites maculosus	Retitricolporites amazonensis	Podocarpidites sp. 1	Podocarpidites sp. 2	Psilaperiporites minimus	Taxodiaceae	Scabraperiporites nativensis	Psilaperiporites robustus	Zonocostites ramonae	Acacia sp.	Aesculiidites sp.	Lycopodiumsporites novomexicanum	Milfordia minima	Retitricolpites sp.	Chomotriletes fragilis	Echiperiporites estelae	Echitriletes muelleri	Microthyriaceae	Monocolpites sp.	Osmundacidites sp.	Polypodiaceoisporites potonei	Ulmoideipites krempii	Verrucatosporites usmensis	Araucariacites australis	Psilatricolpites spp.	Spinozonocolpites echinatus	Tricolporopollenites hians	Gleicheniidites senonicus	Perotrilites sp.	Fungal Spores	Margocolporites vanwijhei	Verrutriporites sp.	Jussitriporites sp.	Psilatricolporites operculatus	Retitricolpites americana		Pediastrum sp.
Oligocene
PA720.4465	R	R	F	R	R	R	R	R	R	R	R	R
Early Oligocene
THCP1									R	R	R		R
COMP1		R			R	R			A	A	R			R	R																												R
CORO.PT.PALY.1		A	R						A	A		R	R	R	R	R	R	R	R	R
late Eocene to early Oligocene
PA79.0	R	R	R			R					R	R	R	R	R					R	R	R	R	R	R	R	R	R
997121		A				R			A	A	R	R	R		R								R						R
PB			F	R								A	A	R								F	R		R			R		R	C	R	R										F
PA			F									C	R									R			R									R	R								R
AND.PT.PALY.1									R	R
late Eocene
R99P7		R		R							C	R	C	F	R							R			F								R			A	R	R	R	R			R
997111		F	R							R	R	R	R												F																R
Note: Occurrence frequency of specimens in individual samples:
R = Rare, less than 6 specimens/slide;
F = Frequent, 6 to 15 specimens/slide;
C = Common, 16 to 30 specimens/slide;
A = Abundant, over 30 specimens/slide.

## Sheet: Paly_report
UNPUBLISHED PALYNOLOGICAL DATA: below is info from report by coauthor & palynologist, Gerald Waanders
CQP-4	CQ-4P (Bolivia, Potoco Fm. Equivalent)
Spores and Pollen:
Araucariacites australis	(R)
Monocolpate sp.	(R)
Pediastrum paleogeneites	(R)
Psilatricolporites crassus	(R)
Retibrevitricolpites triangulatus (?)	(R)
Retitricolporites hispidus	(R)
Scabraperiporites nativensis	(R)
Schizosporis reticulatus	(R)
Zonocostites ramonae	(R)
Kerogen Content:	5% Amorphous,10% Cuticular, and 85% Woody
T.A.I:	2.5
AGE:	Probable Late Eocene
ENVIRONMENT:	Deltaic/Shallow Lacustrine
*Retibrevitricolpites triangulatus is restricted to Late Eocene, but the identification of the specimen noted in this sample is questionable.
CQP-6	CQP-6 (Bolivia, Potoco Fm. Equivalent)
Spores and Pollen:
Retitricolporites hispidus	(R)
Kerogen Content:	10 Cuticular and 90% Woody
T.A.I.:	2.5
AGE:	?Late Eocene to Oligocene
ENVIRONMENT:	Floodplain/Beach
CQP-8	CPQ-8 (Bolivia, Potoco Fm. Equivalent)
Spores and Pollen:
Acacia sp.	(R)
Araucariacites australis	(R)
Echiperiporites estelae	(R)
Echiperiporites akanthos	(R)
Margocolporites vanwijhei	(R)
Podocarpidites sp. 1	(F)
Podocarpidites sp. 2	(R)
Polypodiaceoisporites sp.	(R)
Psilatricolporites crassus	(R)
Retitricolporites hispidus	(R)
Scabraperiporites nativensis	(F)
Sphagnum sp.	(R)
Tricolpopollenites hians	(R)
Kerogen Content:	10% Cuticular and 90% Woody
TAI:	2.5
AGE:	Late Eocene
ENVIRONMENT:	Fluvial/Swamp
*Margocolporites vanwijhei does not range above the Late Eocene.
